# Supplementary material for: Structures, and electronic and spectral properties of single-atom transition metal-doped boron clusters MB24− (M = Sc, Ti, V, Cr, Mn, Fe, Co, and Ni)
Source: Royal Society of Chemistry journal article supplement (doi:10.1039/d2ra02500k), 2022-01-01
Supplement: d2ra02500k1.pdf [file d2ra02500k1.pdf]

**Structures, electronic and spectral properties of single-atom  
transition metal-doped boron clusters  $MB_{24}^-$  (M=Sc, Ti, V, Cr, Mn,  
Fe, Co, and Ni)**

Shi-Xiong Li,<sup>\*a</sup> Yue-Ju Yang,<sup>a</sup> De-Liang Chen,<sup>a</sup> Zheng-Wen Long<sup>b</sup>

<sup>a</sup>School of Physics and Electronic Science, Guizhou Education University, Guiyang 550018, Guizhou, People's Republic of China. E-mail: leesxoptics@163.com

<sup>b</sup>College of physics, Guizhou University, Guiyang 550025, Guizhou, People's Republic of China

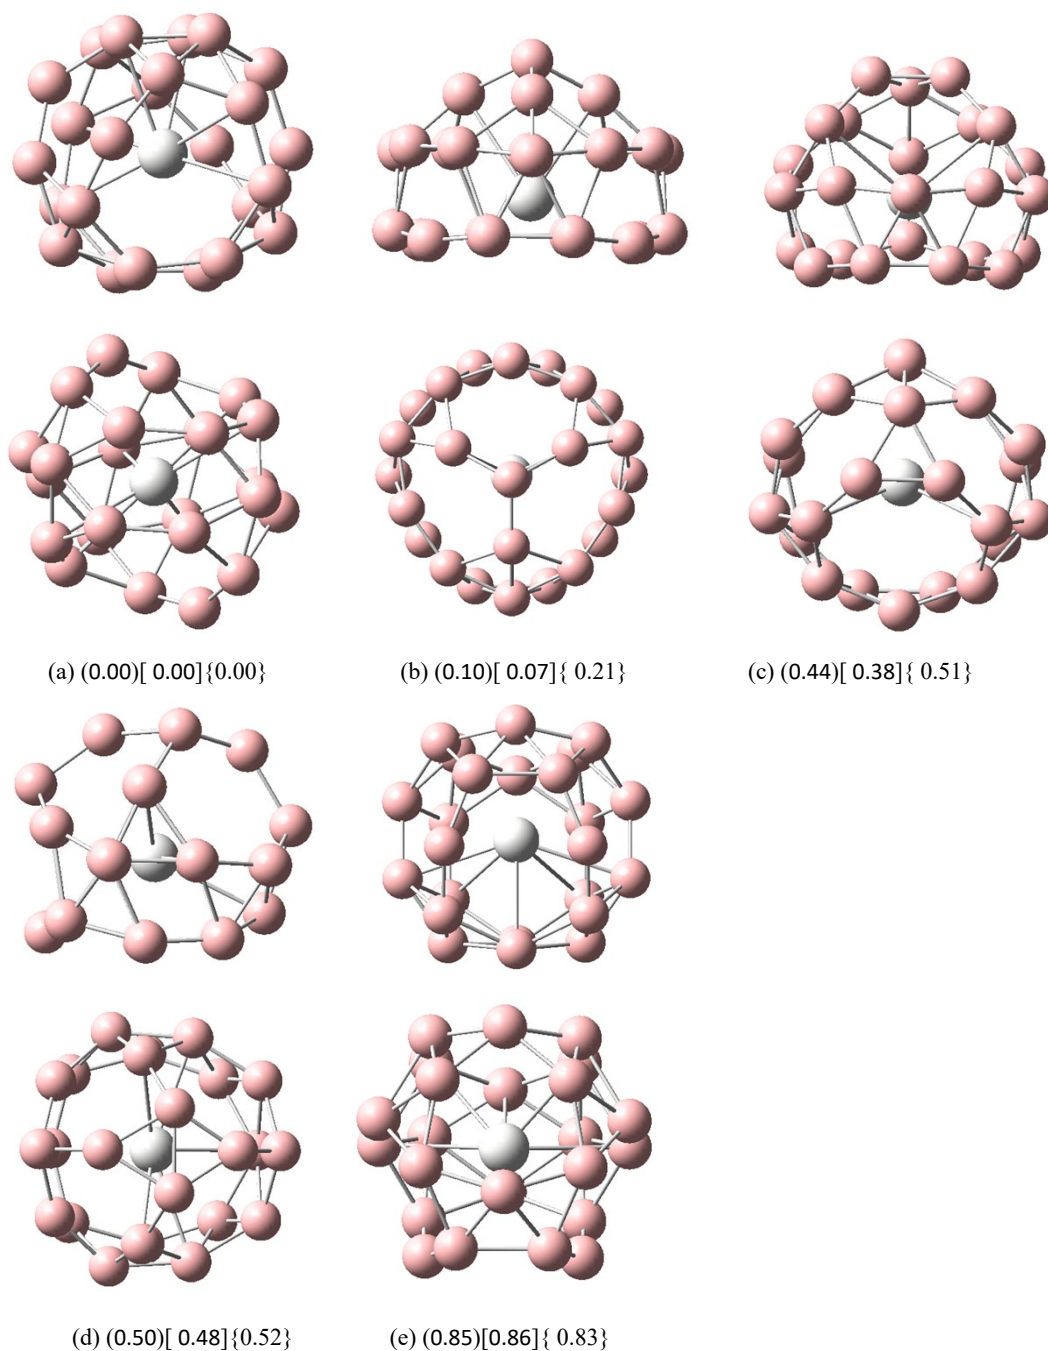

**Figure. S1** Low-lying isomers of doped boron clusters  $\text{ScB}_{24}^-$ . Values in parentheses are the relative energies (eV) of the five low-energy isomers for  $\text{ScB}_{24}^-$  at the PBE0/6-311+G\* level. Values in square brackets are the relative energies (eV) of the five low-energy isomers for  $\text{ScB}_{24}^-$  at the TPSSH/6-311+G\* level. Values in curly brackets are the relative energies (eV) of the five low-energy isomers for  $\text{ScB}_{24}^-$  at the PBE0-D3/6-311+G\* level. The upper row is side view and the bottom row is top view.

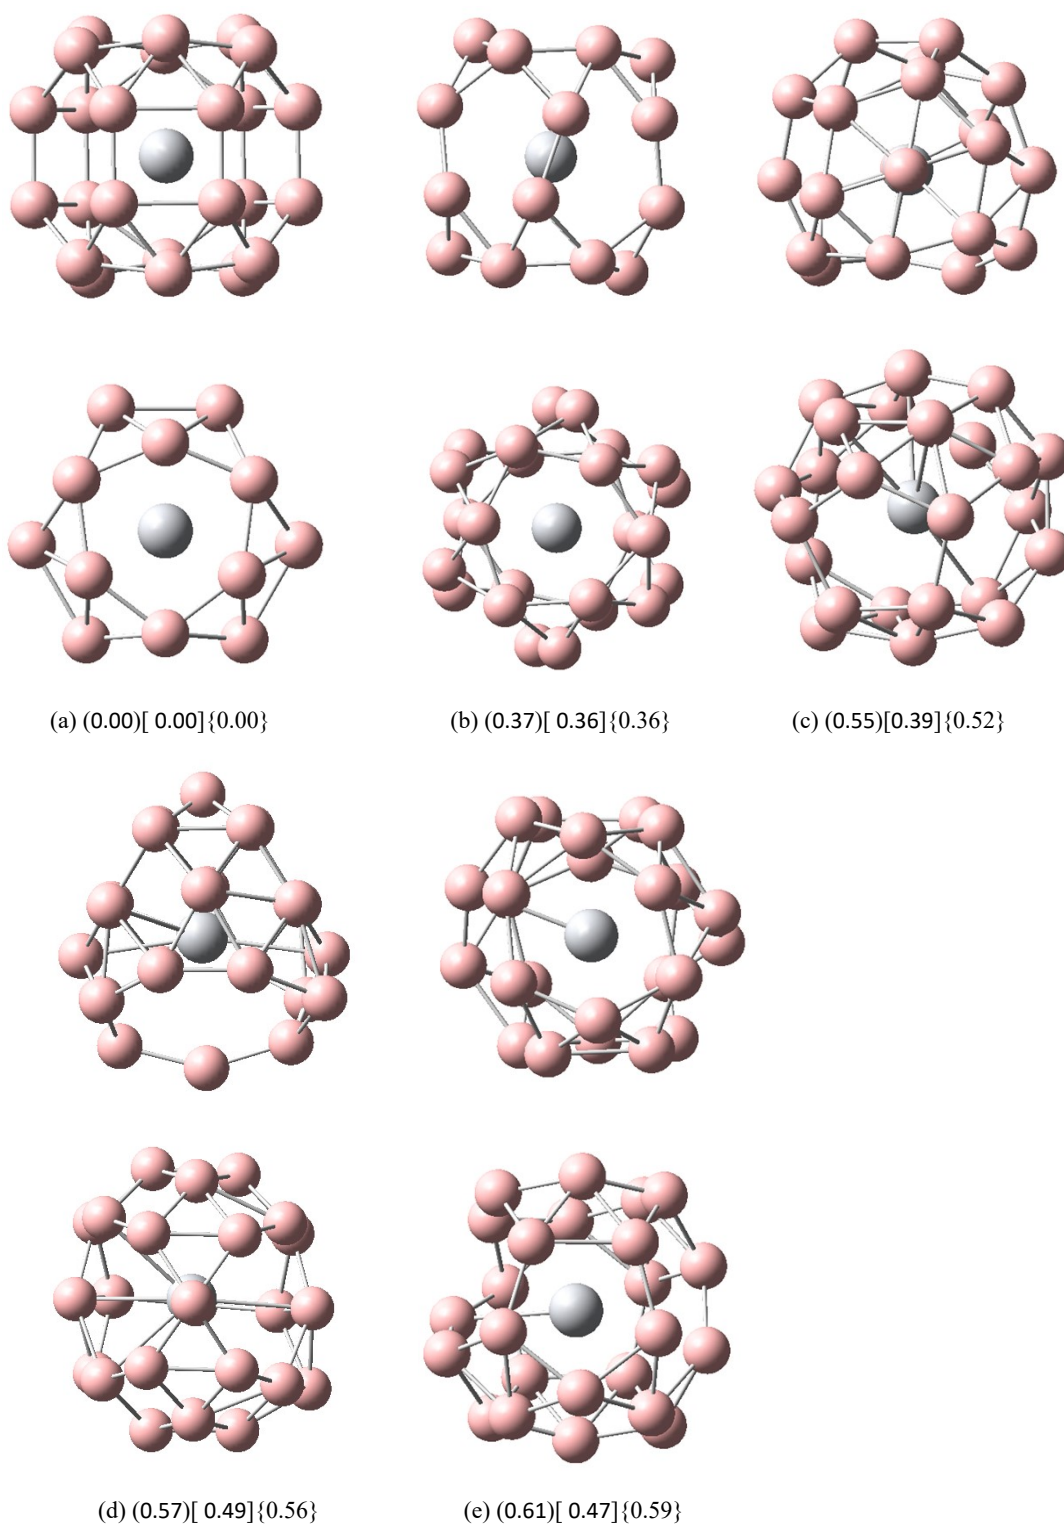

**Figure.S2** Low-lying isomers of doped boron clusters  $\text{TiB}_{24}^-$ . Values in parentheses are the relative energies (eV) of the five low-energy isomers for  $\text{TiB}_{24}^-$  at the PBE0/6-311+G\* level. Values in square brackets are the relative energies (eV) of the five low-energy isomers for  $\text{TiB}_{24}^-$  at the TPSSH/6-311+G\* level. Values in curly brackets are the relative energies (eV) of the five low-energy isomers for  $\text{TiB}_{24}^-$  at the PBE0-D3/6-311+G\* level. The upper row is side view and the bottom row is top view.

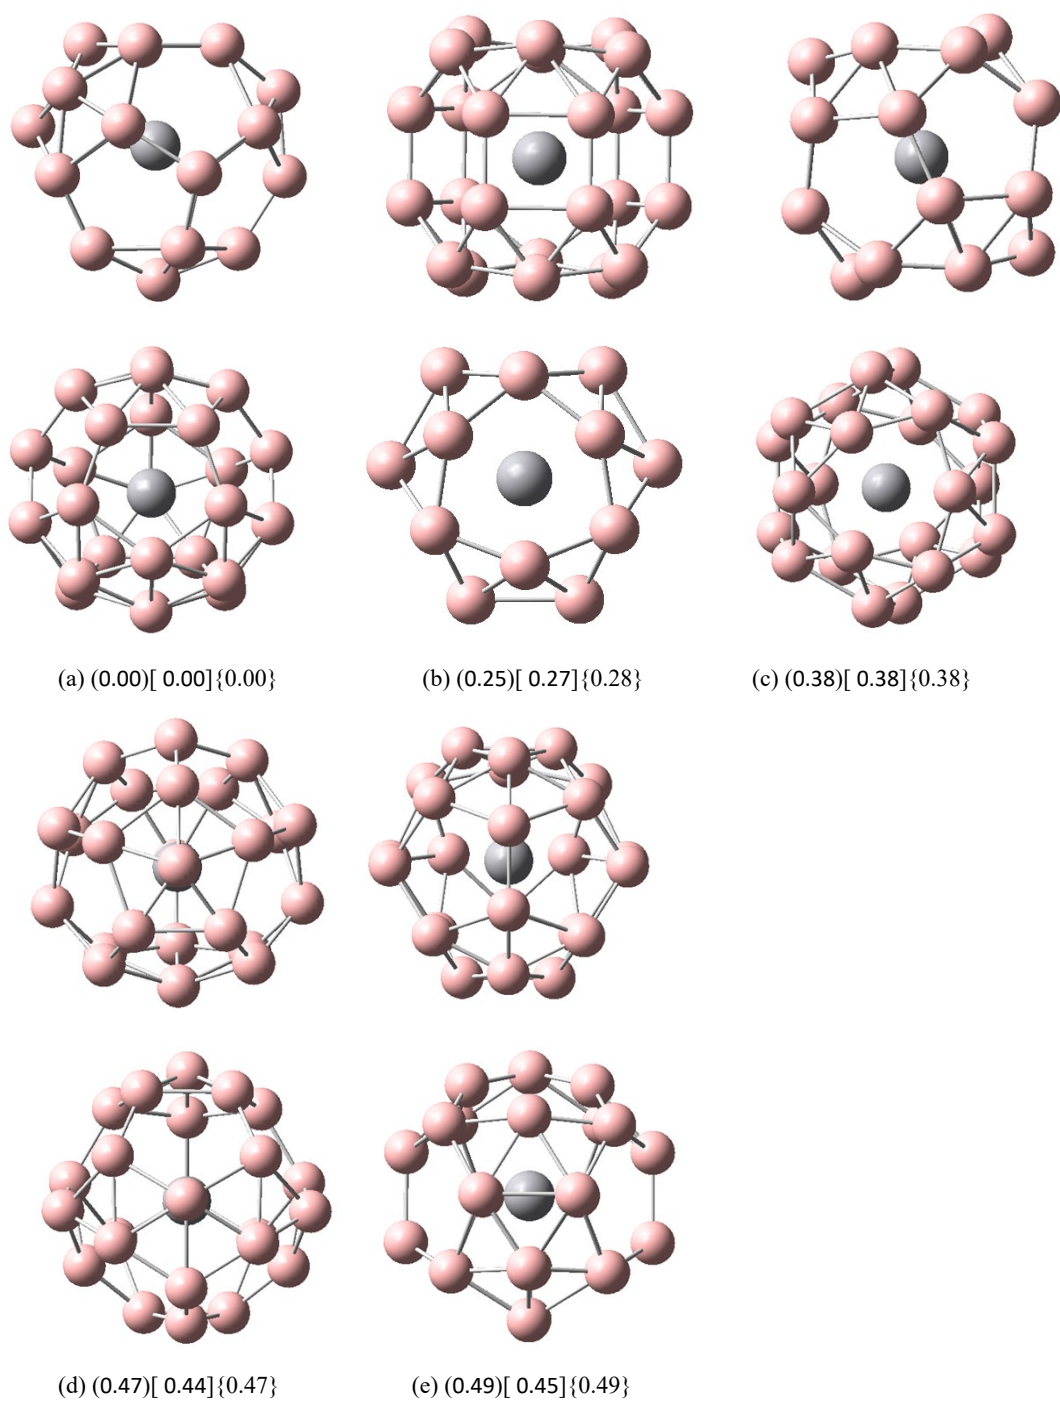

**Figure. S3** Low-lying isomers of doped boron clusters  $\text{VB}_{24}^-$ . Values in parentheses are the relative energies (eV) of the five low-energy isomers for  $\text{VB}_{24}^-$  at the PBE0/6-311+G\* level. Values in square brackets are the relative energies (eV) of the five low-energy isomers for  $\text{VB}_{24}^-$  at the TPSSH/6-311+G\* level. Values in curly brackets are the relative energies (eV) of the five low-energy isomers for  $\text{VB}_{24}^-$  at the PBE0-D3/6-311+G\* level. The upper row is side view and the bottom row is top view.

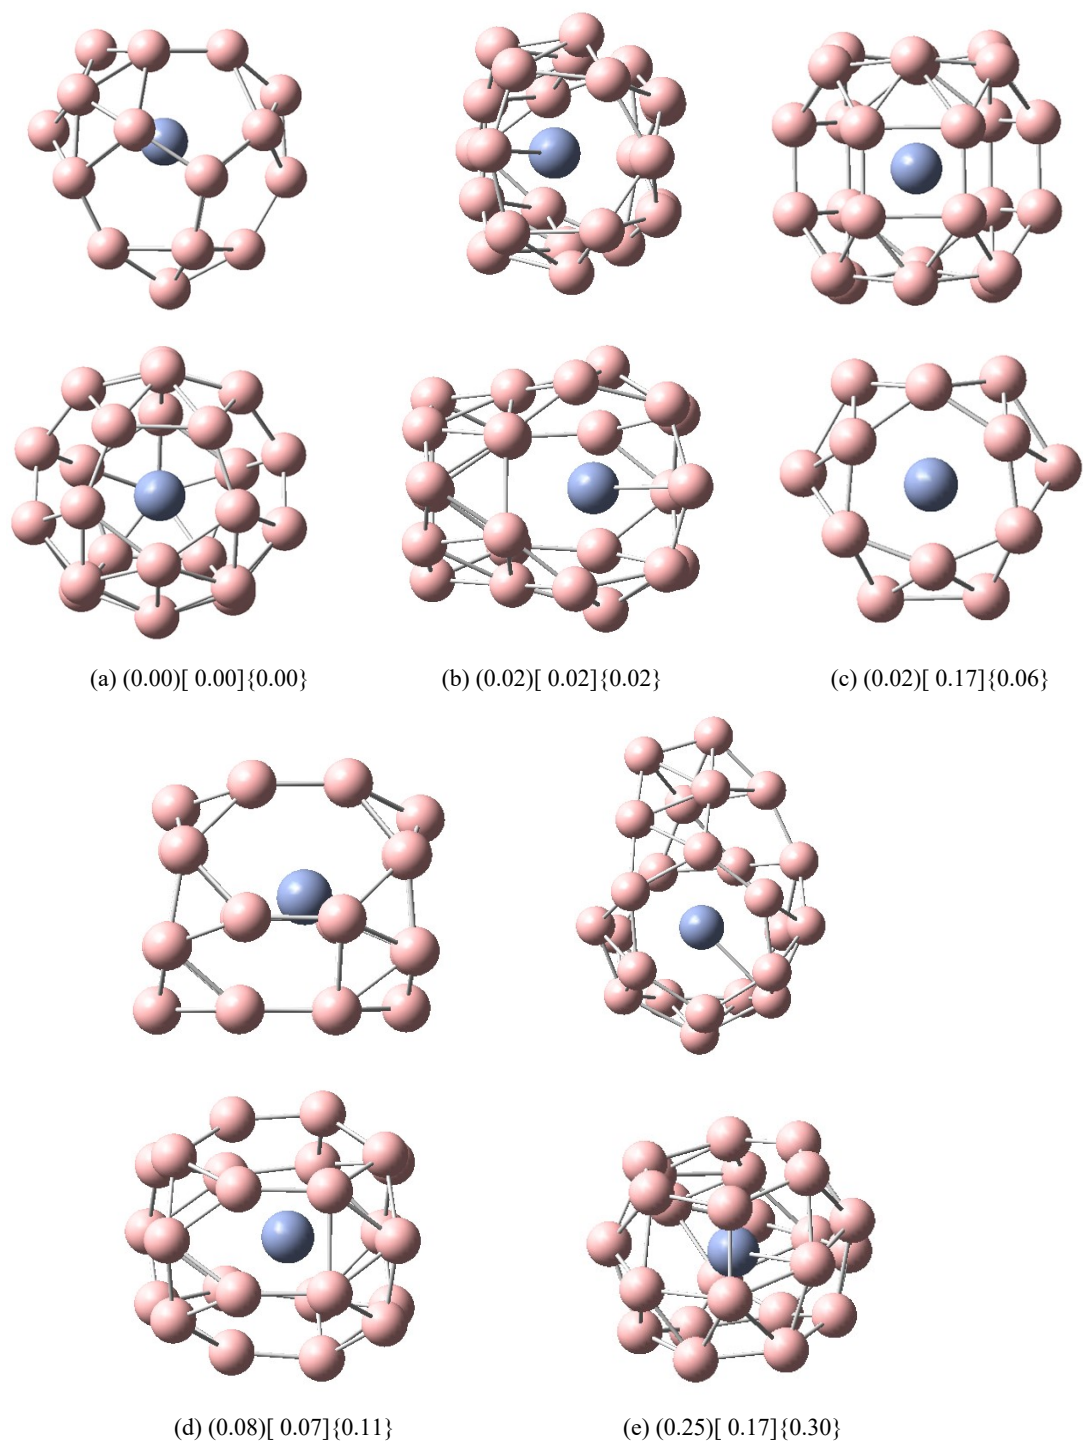

**Figure. S4** Low-lying isomers of doped boron clusters  $\text{CrB}_{24}^-$ . Values in parentheses are the relative energies (eV) of the five low-energy isomers for  $\text{CrB}_{24}^-$  at the PBE0/6-311+G\* level. Values in square brackets are the relative energies (eV) of the five low-energy isomers for  $\text{CrB}_{24}^-$  at the TPSSH/6-311+G\* level. Values in curly brackets are the relative energies (eV) of the five low-energy isomers for  $\text{CrB}_{24}^-$  at the PBE0-D3/6-311+G\* level. The upper row is side view and the bottom row is top view.

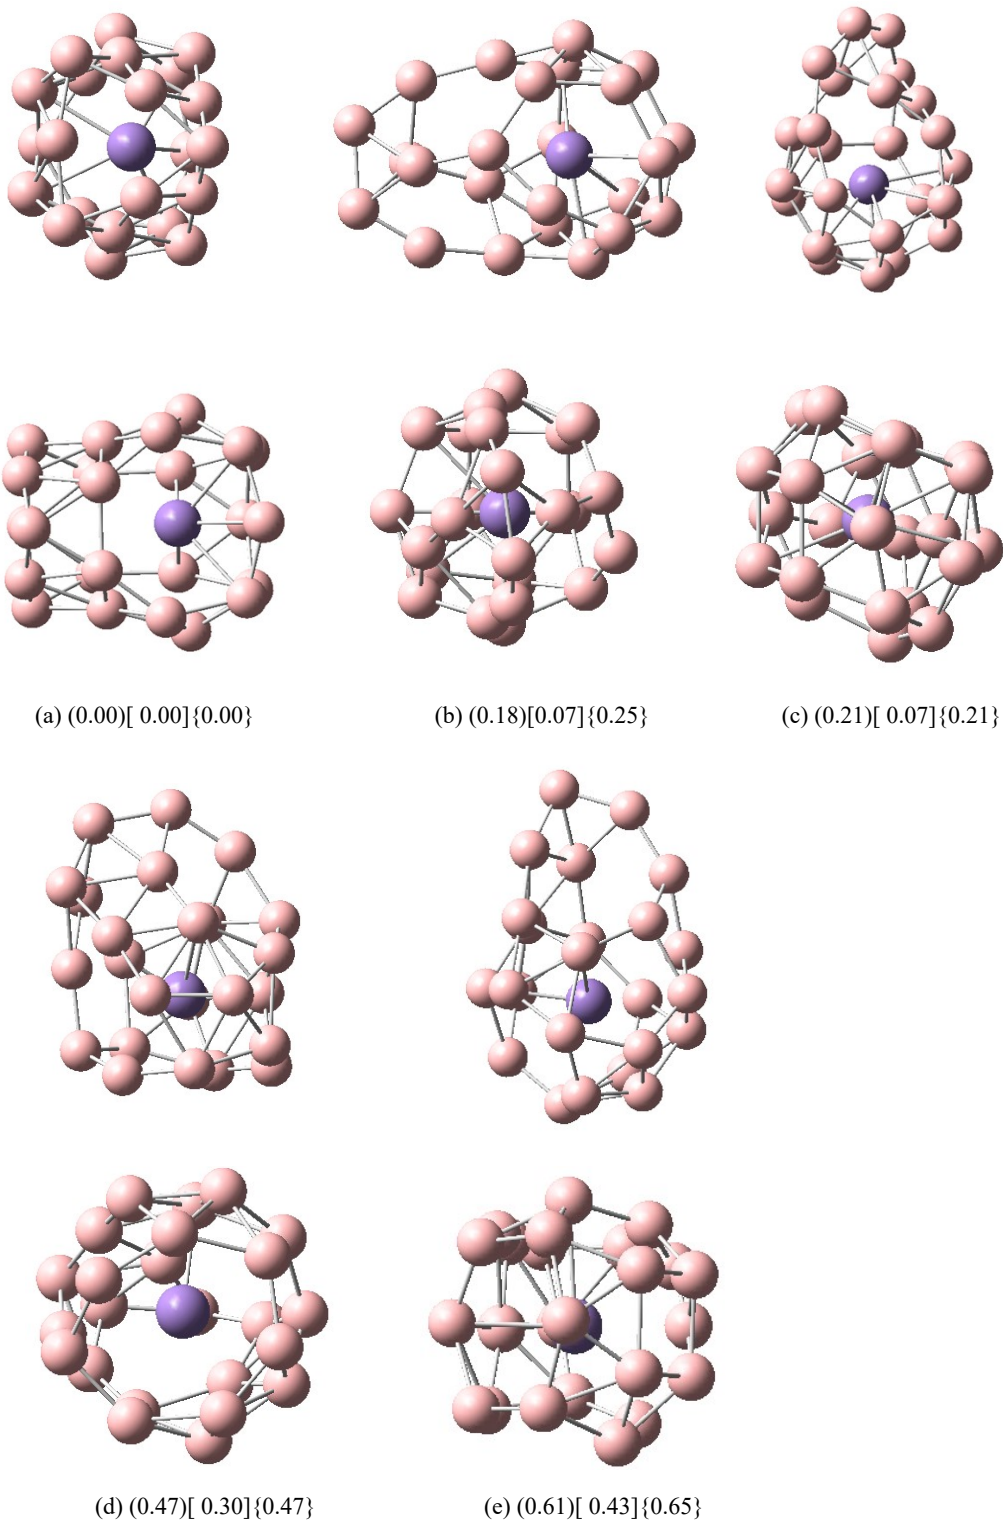

**Figure. S5** Low-lying isomers of doped boron clusters  $\text{MnB}_{24}^-$ . Values in parentheses are the relative energies (eV) of the five low-energy isomers for  $\text{MnB}_{24}^-$  at the PBE0/6-311+G\* level. Values in square brackets are relative energies (eV) of the five low-energy isomers for  $\text{MnB}_{24}^-$  at the TPSSH/6-311+G\* level. Values in curly brackets are the relative energies (eV) of the five low-energy isomers for  $\text{MnB}_{24}^-$  at the PBE0-D3/6-311+G\* level. The upper row is side view and the bottom row is top view.

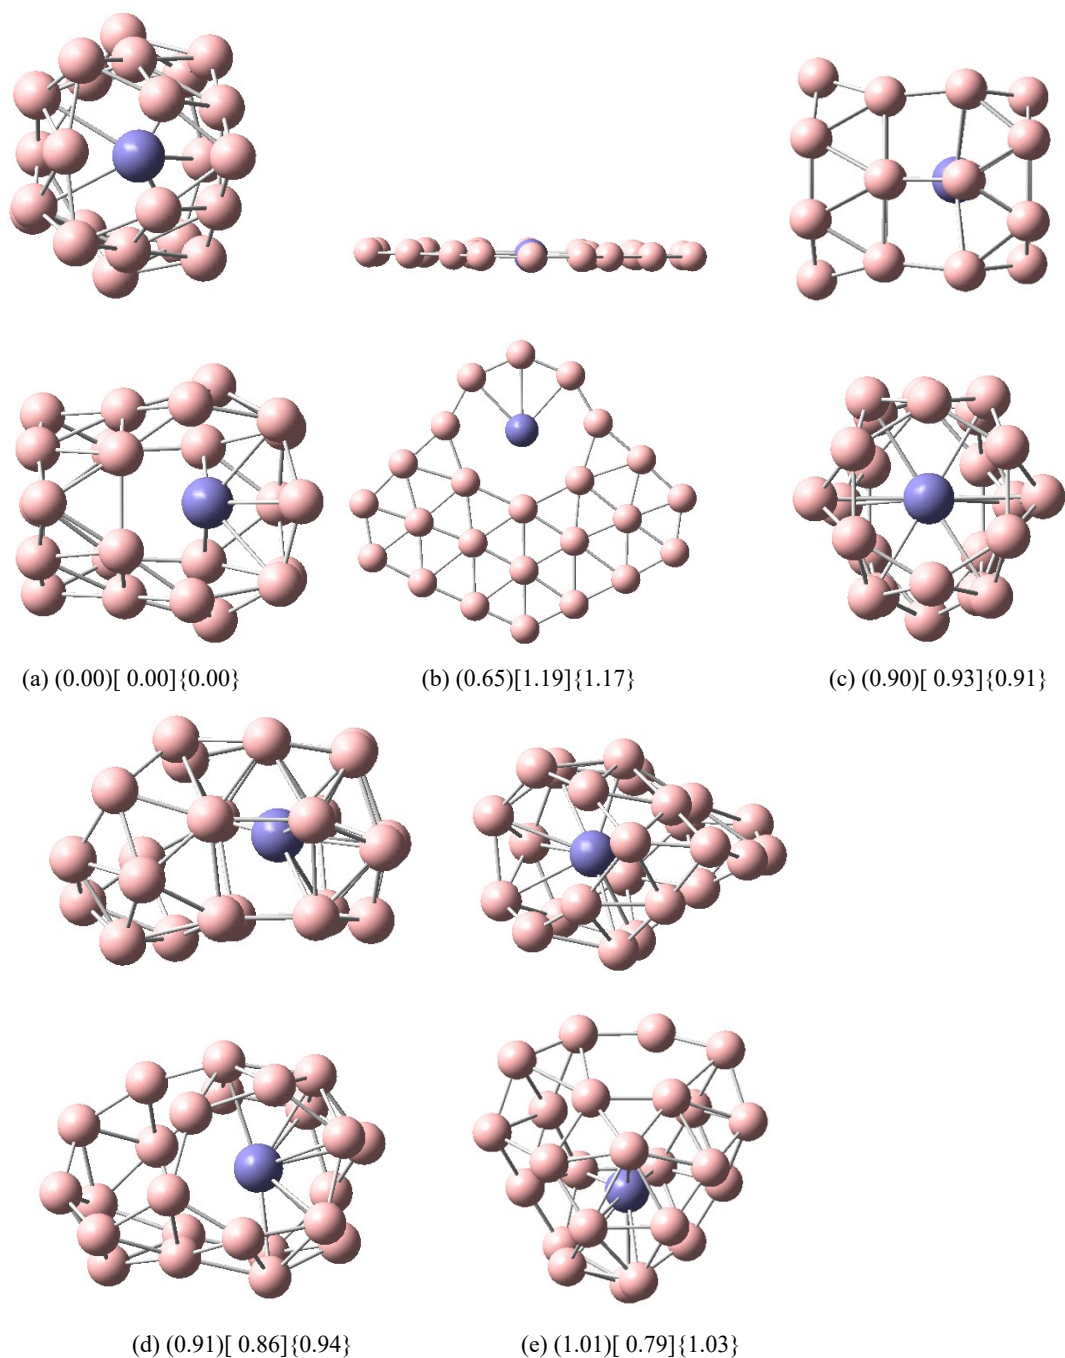

**Figure. S6** Low-lying isomers of doped boron clusters  $\text{FeB}_{24}^-$ . Values in parentheses are the relative energies (eV) of the five low-energy isomers for  $\text{FeB}_{24}^-$  at the PBE0/6-311+G\* level. Values in square brackets are relative energies (eV) of the five low-energy isomers for  $\text{FeB}_{24}^-$  at the TPSSH/6-311+G\* level. Values in curly brackets are the relative energies (eV) of the five low-energy isomers for  $\text{FeB}_{24}^-$  at the PBE0-D3/6-311+G\* level. The upper row is side view and the bottom row is top view.

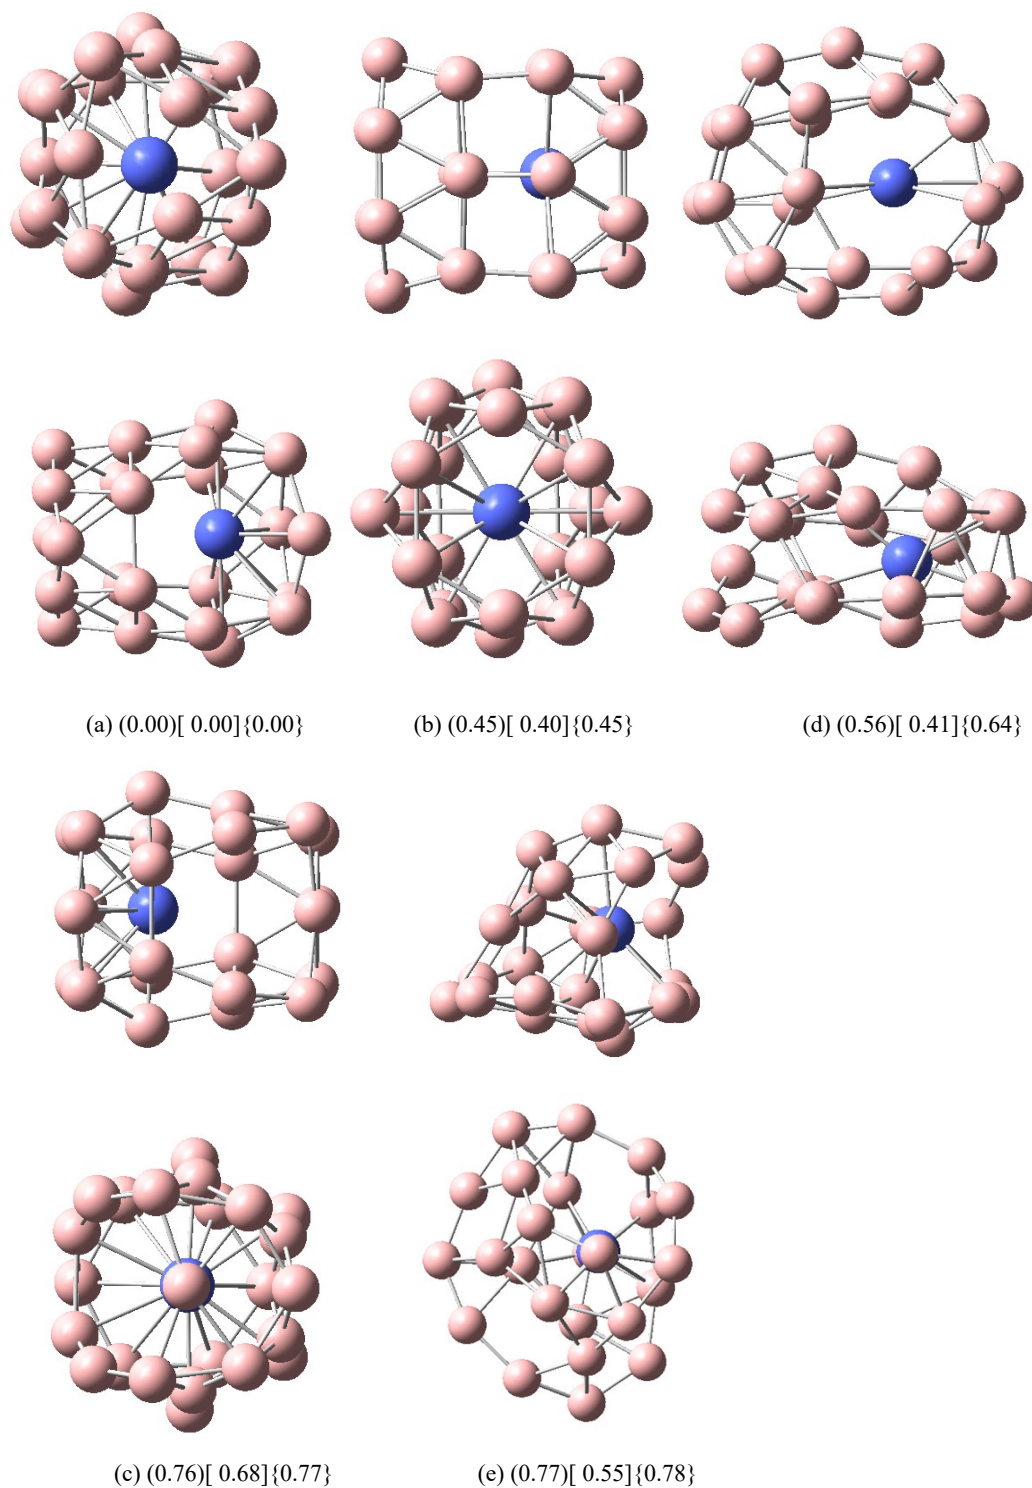

**Figure. S7** Low-lying isomers of doped boron clusters  $\text{CoB}_{24}^-$ . Values in parentheses are the relative energies (eV) of the five low-energy isomers for  $\text{CoB}_{24}^-$  at the PBE0/6-311+G\* level. Values in square brackets are relative energies (eV) of the five low-energy isomers for  $\text{CoB}_{24}^-$  at the TPSSH/6-311+G\* level. Values in curly brackets are the relative energies (eV) of the five low-energy isomers for  $\text{CoB}_{24}^-$  at the PBE0-D3/6-311+G\* level. The upper row is side view and the bottom row is top view.



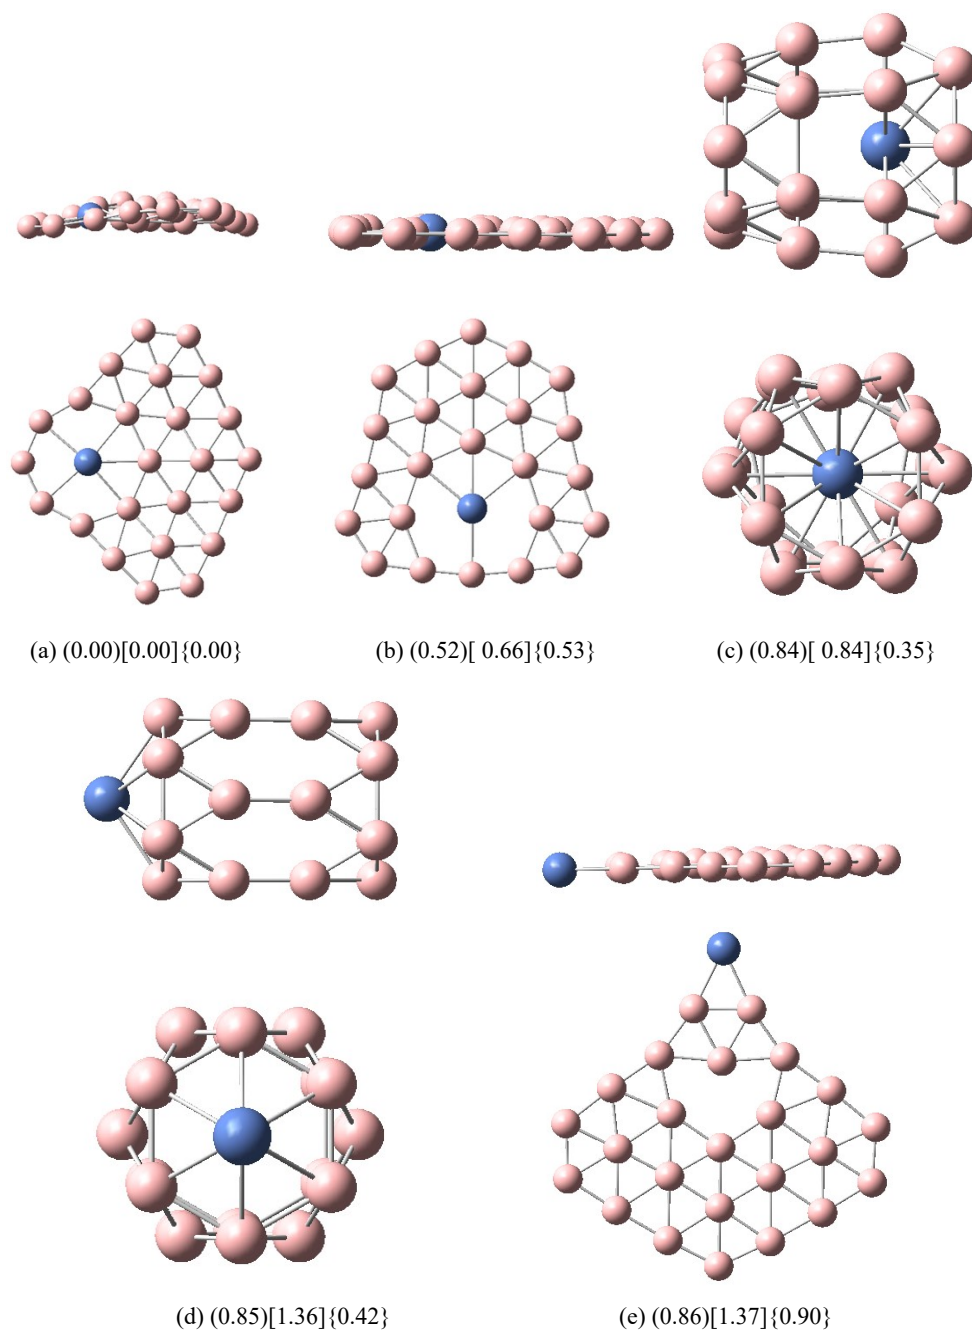

**Figure. S8** Low-lying isomers of doped boron clusters  $\text{NiB}_{24}^-$ . Values in parentheses are the relative energies (eV) of the five low-energy isomers for  $\text{NiB}_{24}^-$  at the PBE0/6-311+G\* level. Values in square brackets are relative energies (eV) of the five low-energy isomers for  $\text{NiB}_{24}^-$  at the TPSSH/6-311+G\* level. Values in curly brackets are the relative energies (eV) of the five low-energy isomers for  $\text{NiB}_{24}^-$  at the PBE0-D3/6-311+G\* level. The upper row is side view and the bottom row is top view.

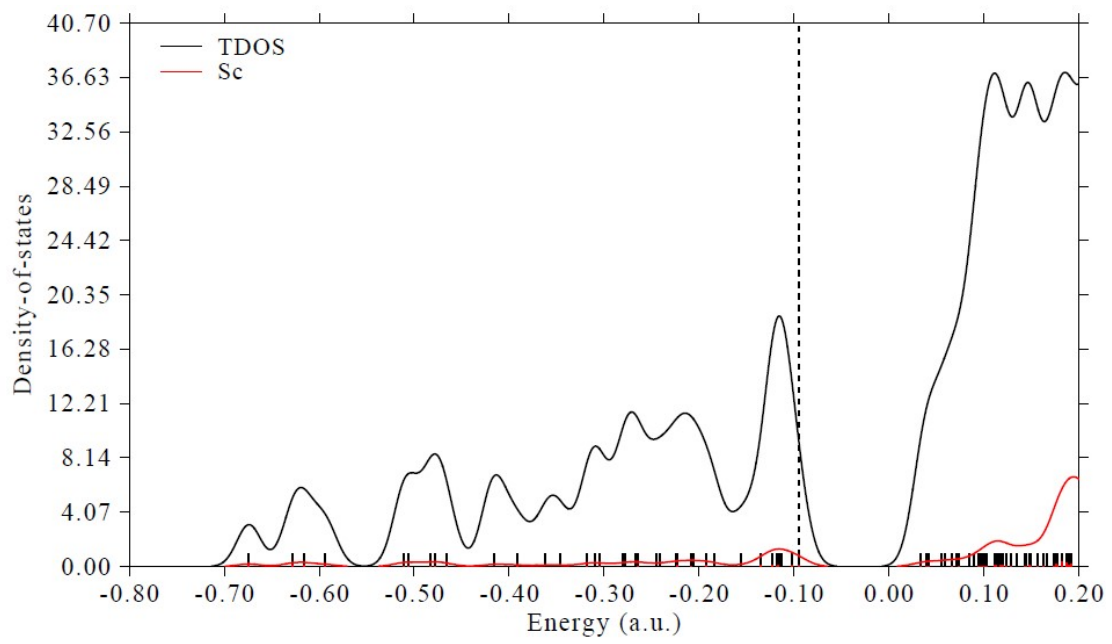

(a)

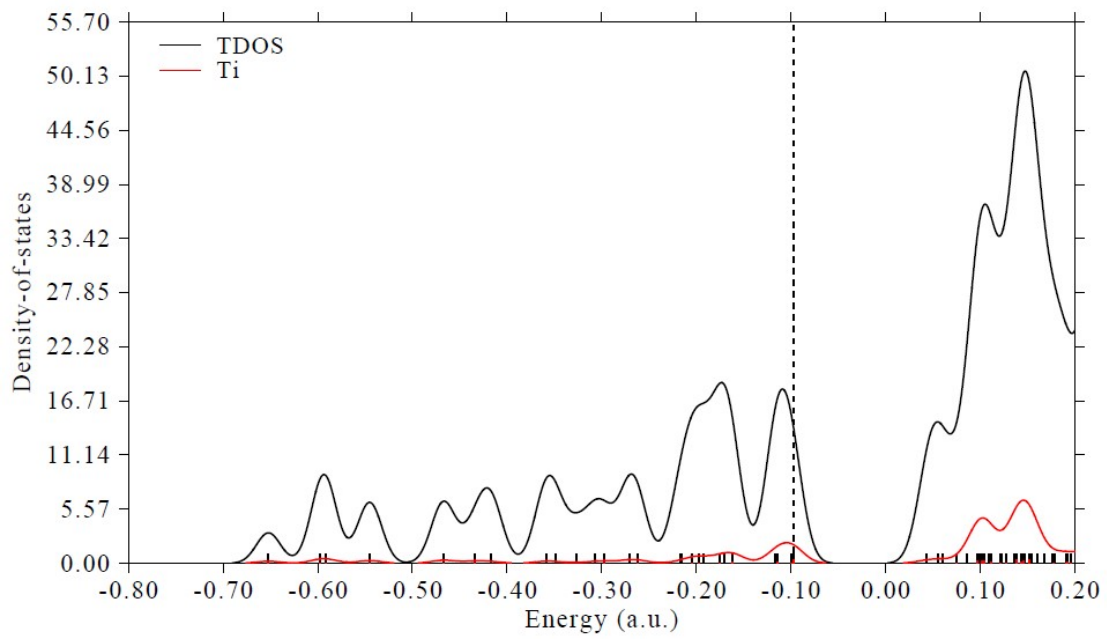

(b)

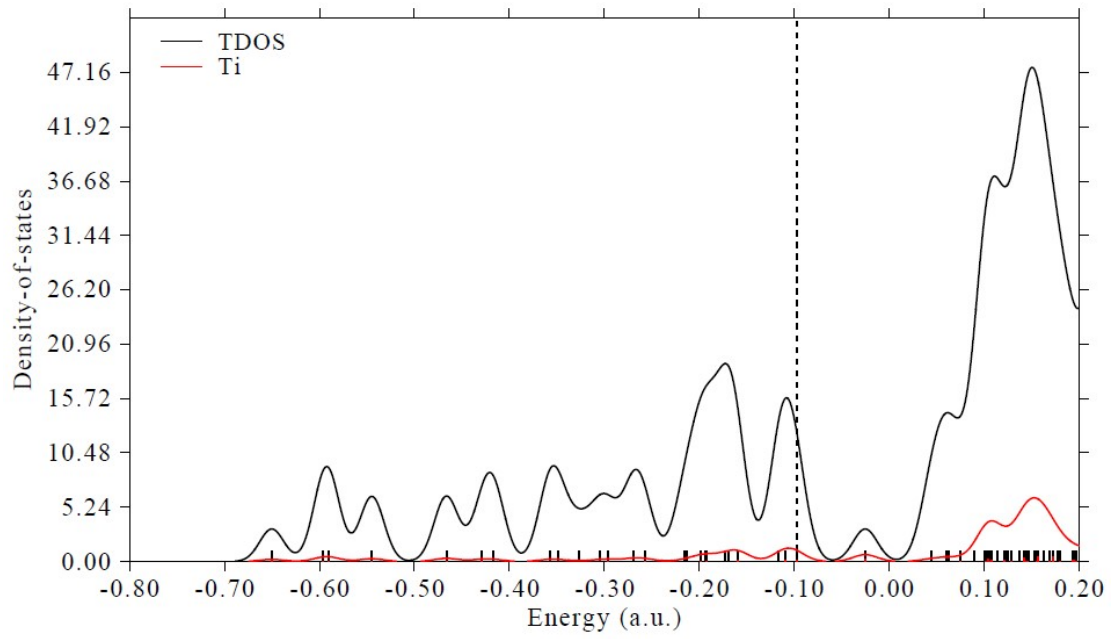

(c)

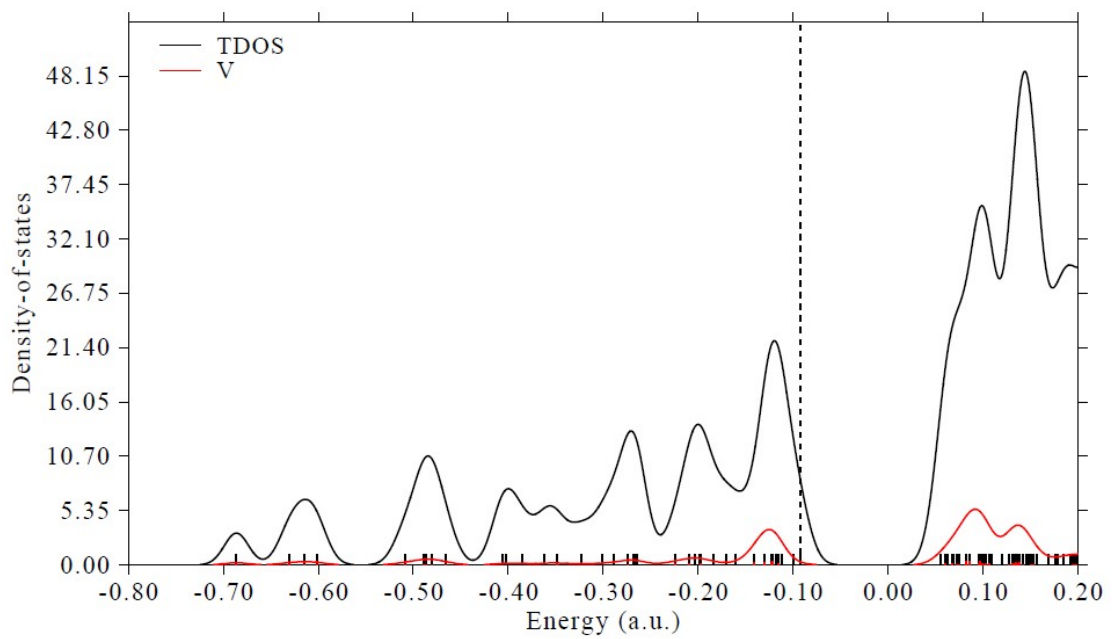

(d)

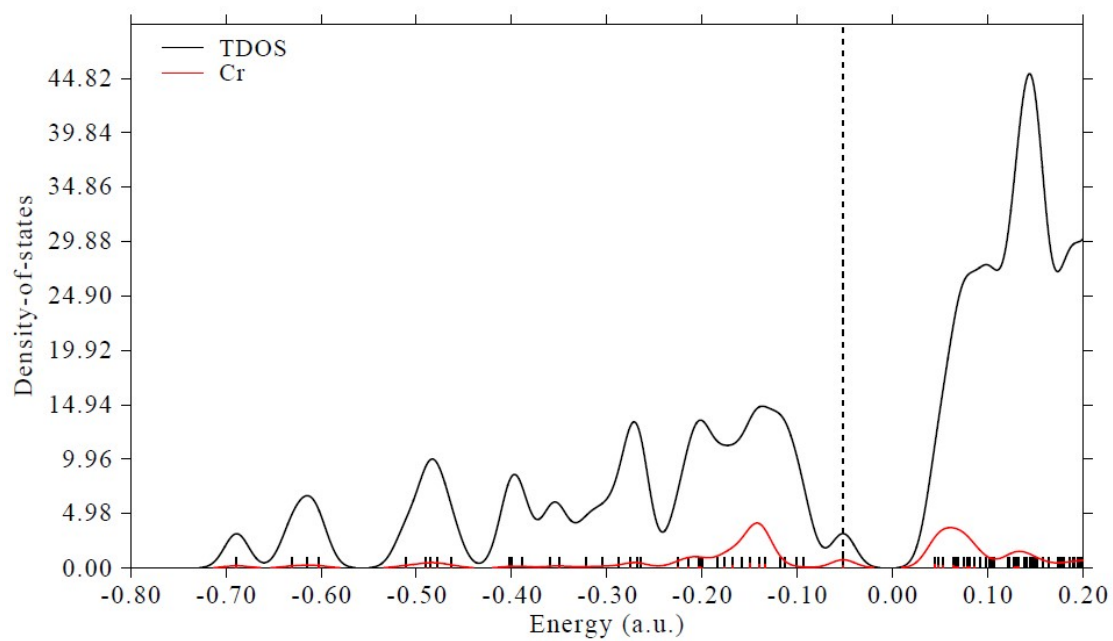

(e)

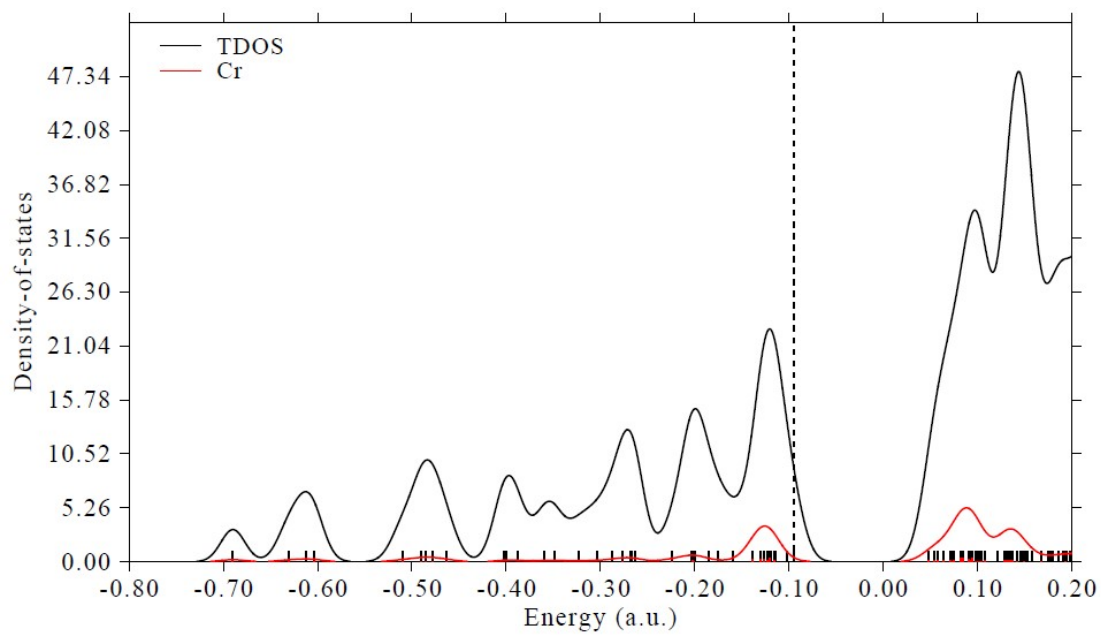

(f)

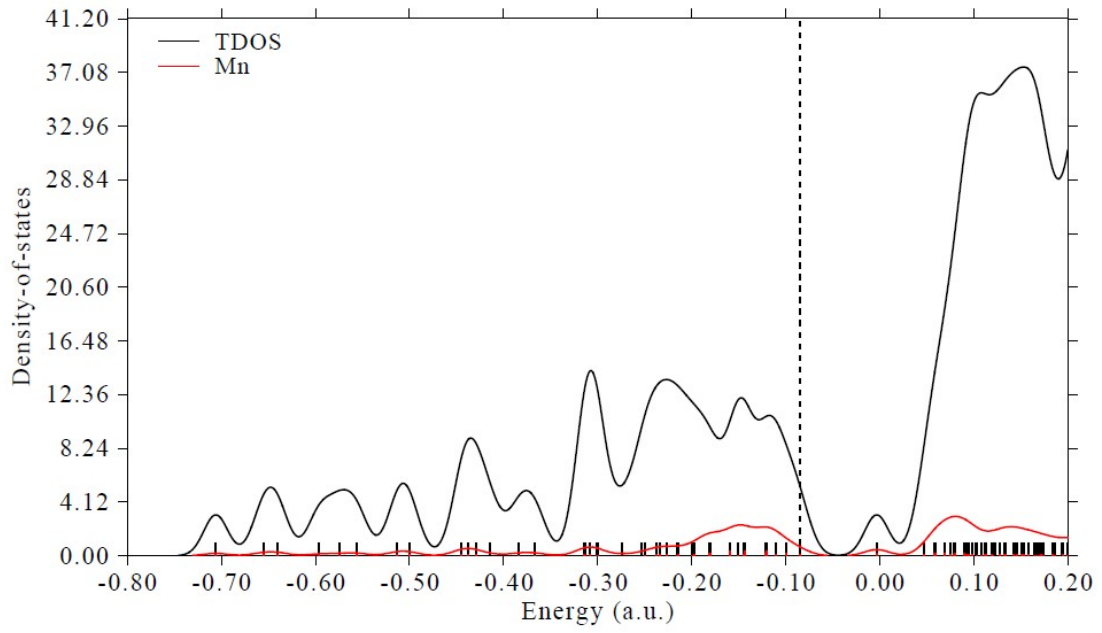

(g)

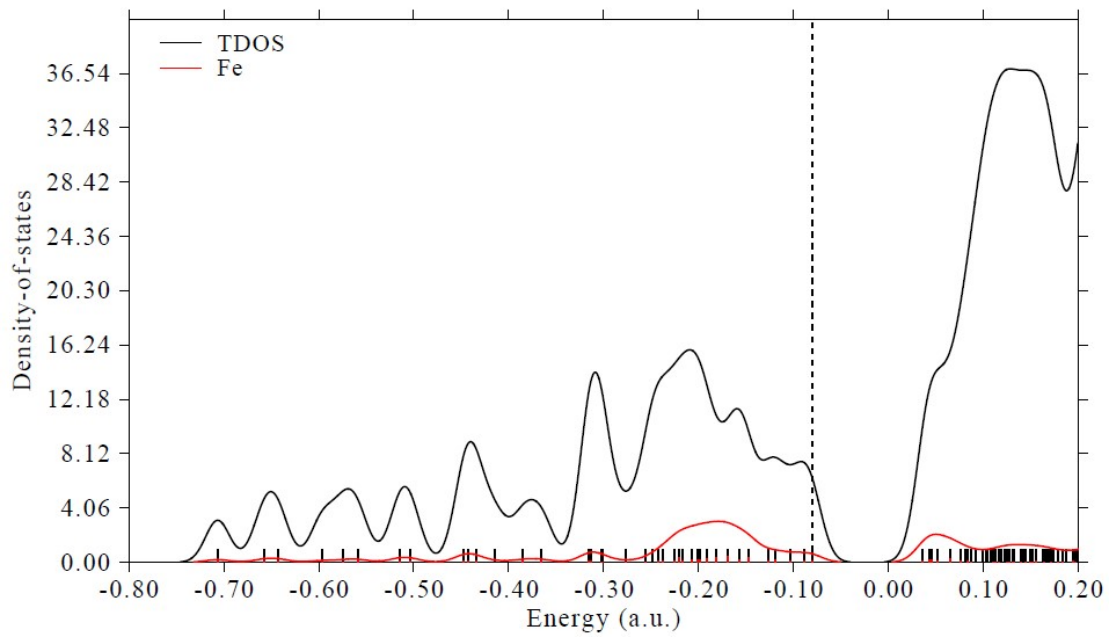

(h)

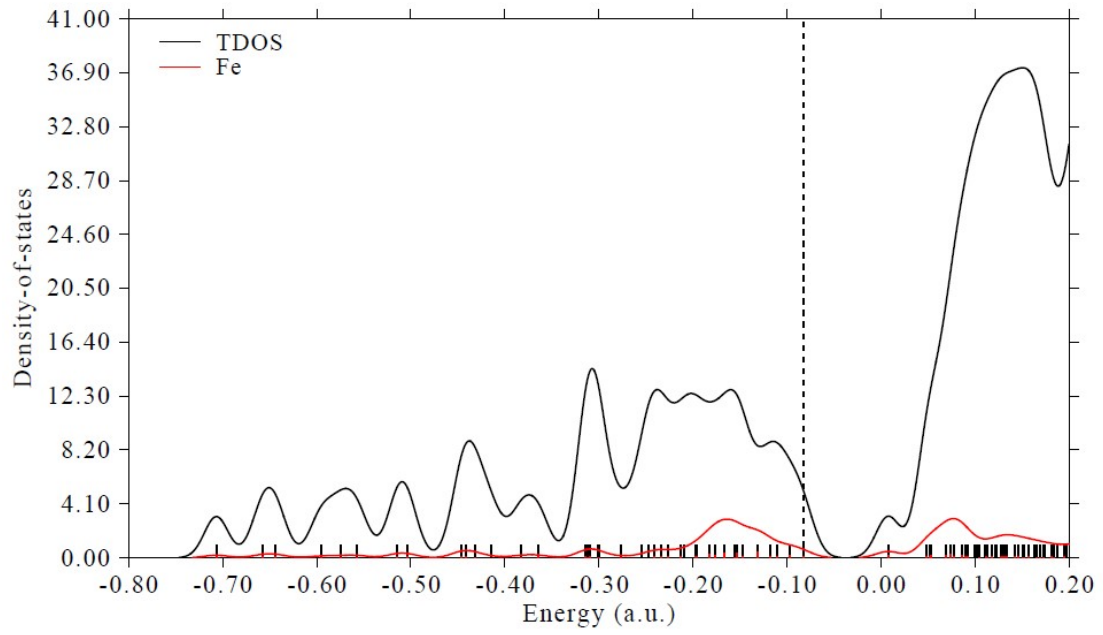

(i)

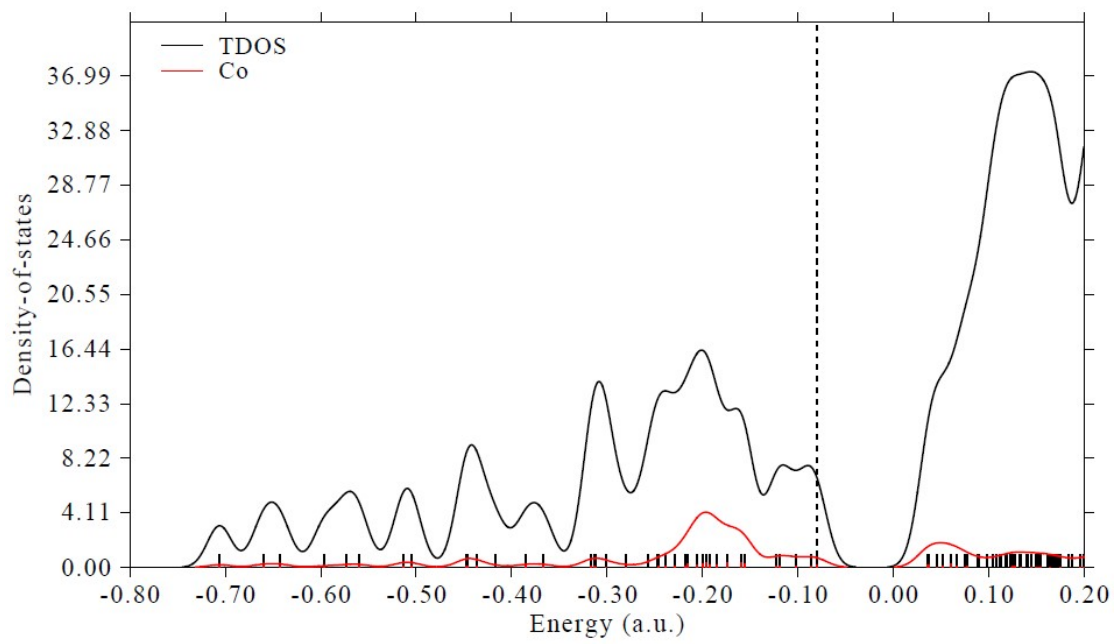

(j)

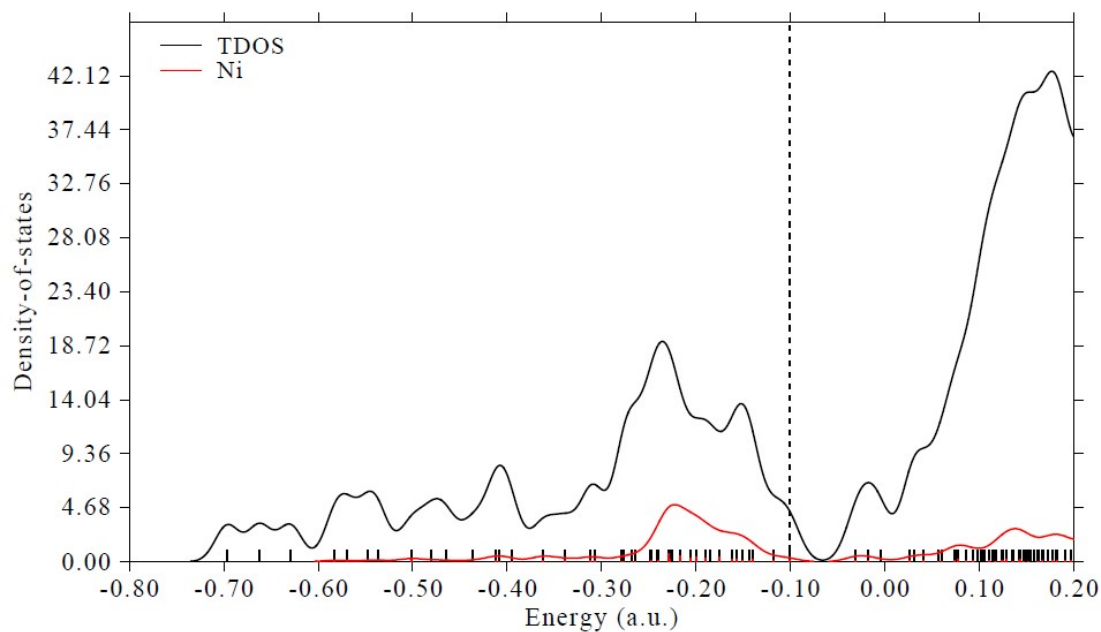

(k)

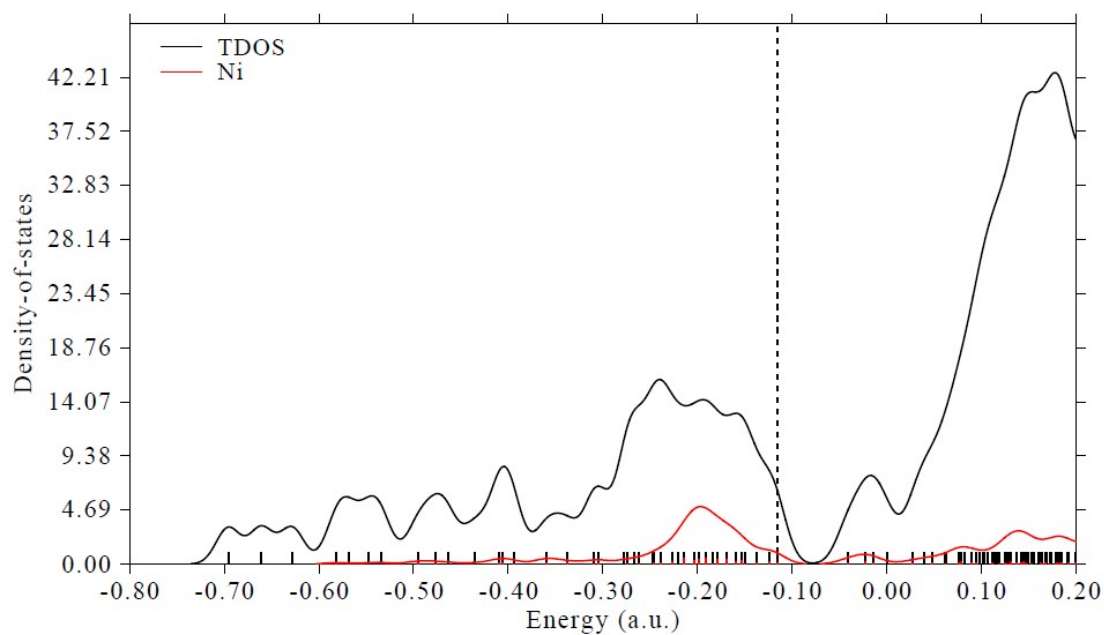

(l)

**Figure. S9** Total density of states (TDOS) of each cluster and partial density of states (PDOS) of the transition metal atom. (a)  $\text{ScB}_{24}^-$ ; (b) alpha spin for  $\text{TiB}_{24}^-$ ; (c) beta spin for  $\text{TiB}_{24}^-$ ; (d)  $\text{VB}_{24}^-$ ; (e) alpha spin for  $\text{CrB}_{24}^-$ ; (f) beta spin for  $\text{CrB}_{24}^-$ ; (g)  $\text{MnB}_{24}^-$ ; (h) alpha spin for  $\text{FeB}_{24}^-$ ; (i) beta spin for  $\text{FeB}_{24}^-$ ; (j)  $\text{CoB}_{24}^-$ ; (k) alpha spin for  $\text{NiB}_{24}^-$ ; (l) beta spin for  $\text{NiB}_{24}^-$ . The dashed line highlights the position of HOMO (alpha HOMO or beta HOMO). The energy unit a.u. represent hartree and one hartree is 27.21 eV.

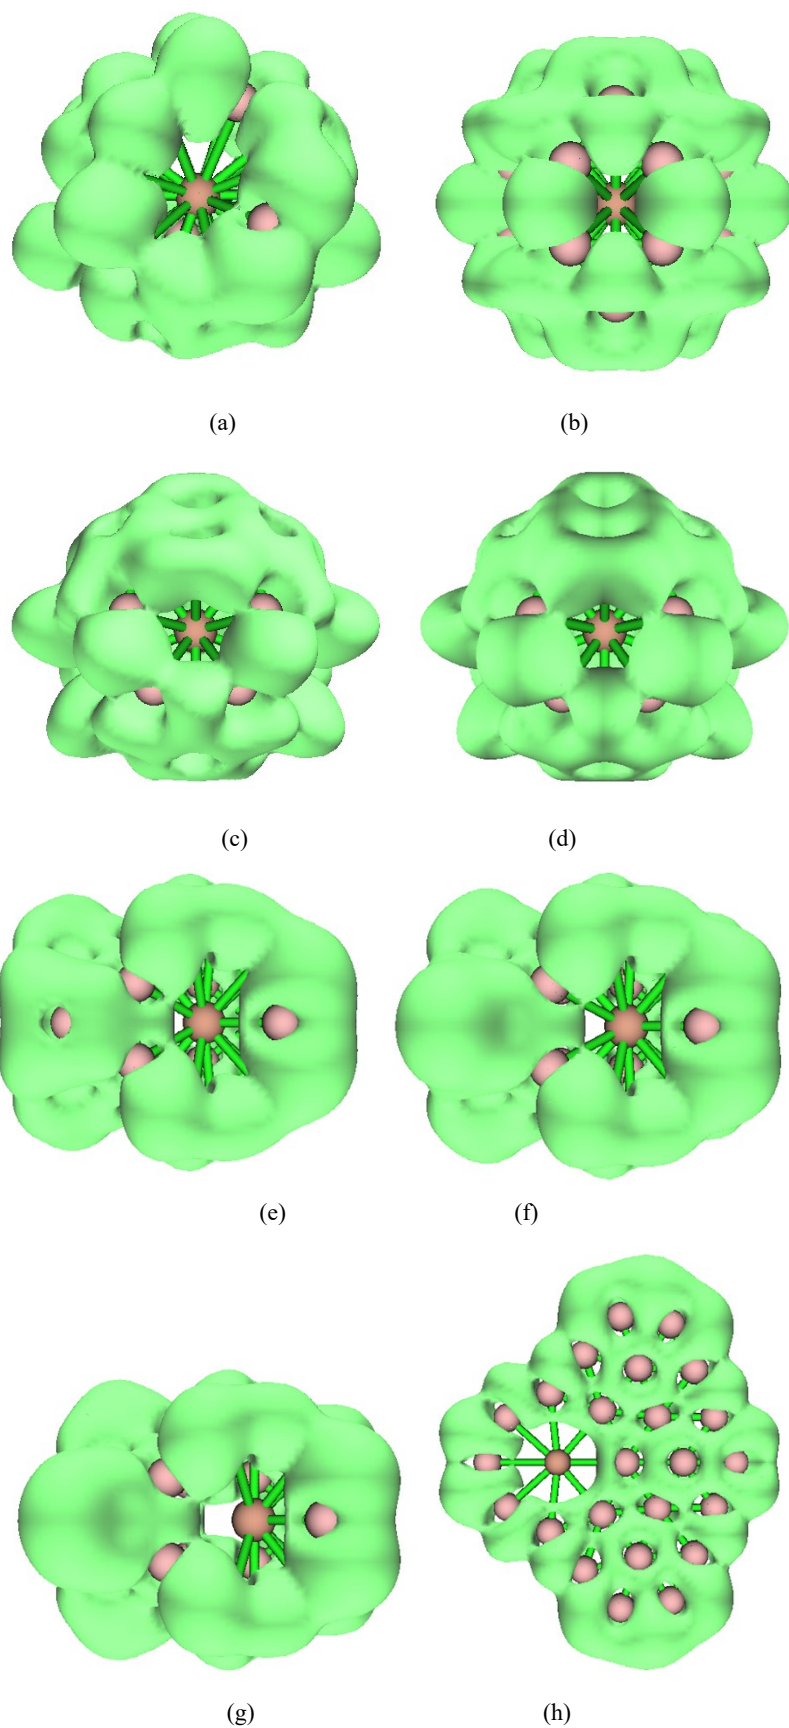

**Figure. S10** Electron localization function (ELF) with the isovalue set to 0.60. (a)  $\text{ScB}_{24}^-$ ; (b)  $\text{TiB}_{24}^-$ ; (c)  $\text{VB}_{24}^-$ ; (d)  $\text{CrB}_{24}^-$ ; (e)  $\text{MnB}_{24}^-$ ; (f)  $\text{FeB}_{24}^-$ ; (g)  $\text{CoB}_{24}^-$ ; (h)  $\text{NiB}_{24}^-$ .



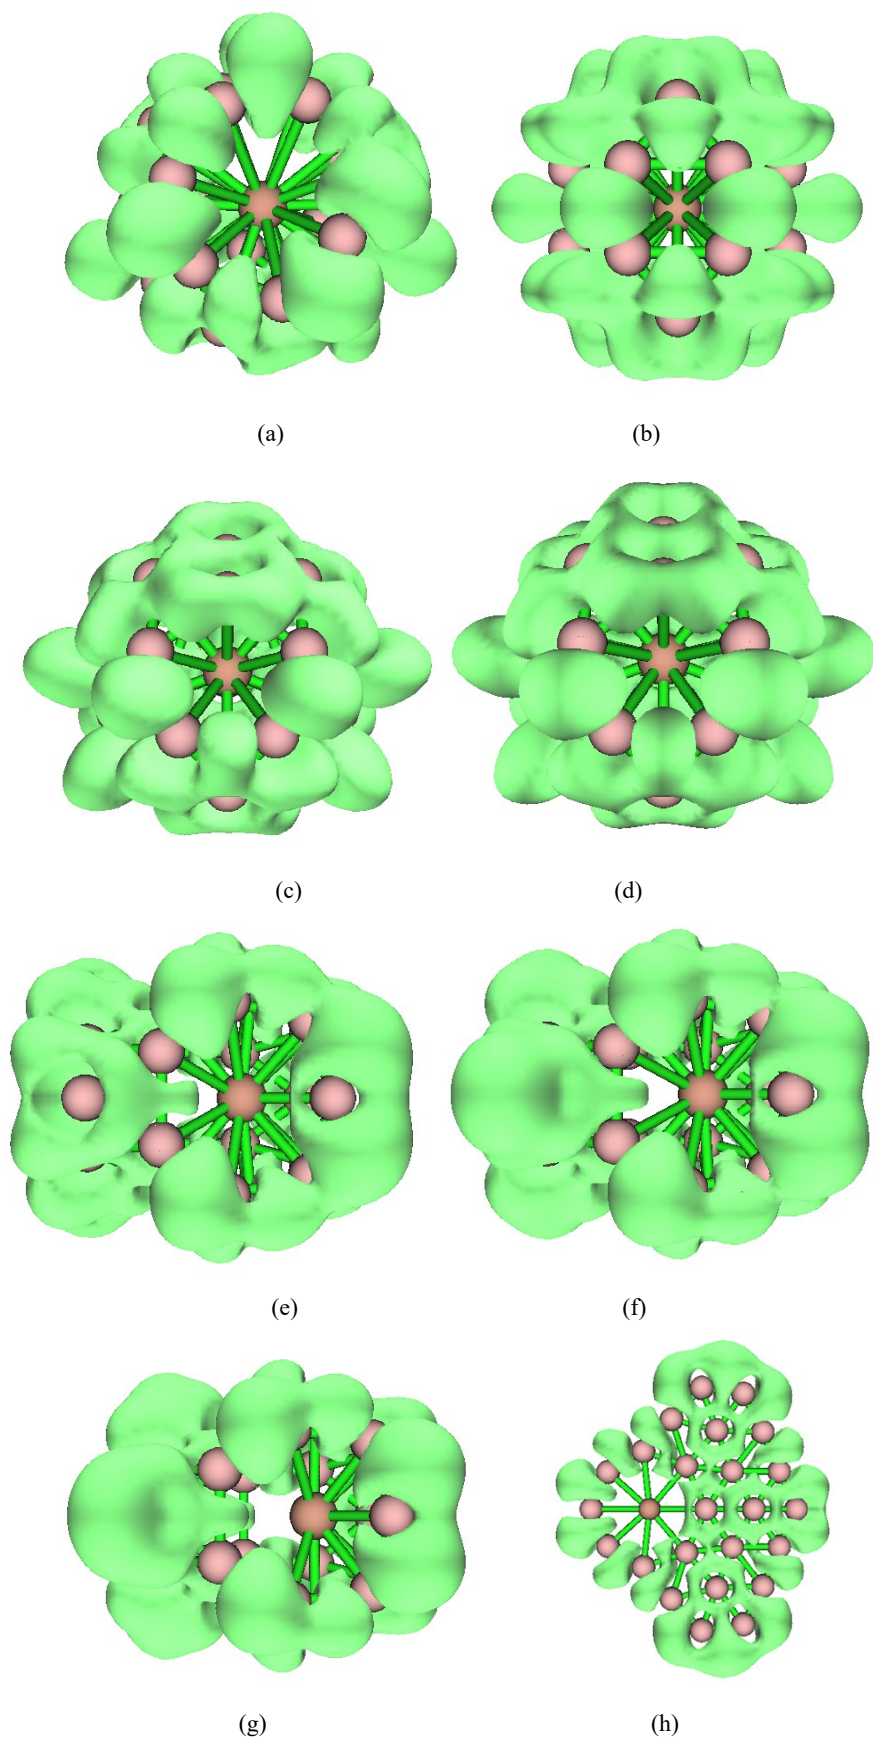

**Figure. S11** Electron localization function (ELF) with the isovalue set to 0.7. (a)  $\text{ScB}_{24}^-$ ; (b)  $\text{TiB}_{24}^-$ ; (c)  $\text{VB}_{24}^-$ ; (d)  $\text{CrB}_{24}^-$ ; (e)  $\text{MnB}_{24}^-$ ; (f)  $\text{FeB}_{24}^-$ ; (g)  $\text{CoB}_{24}^-$ ; (h)  $\text{NiB}_{24}^-$ .

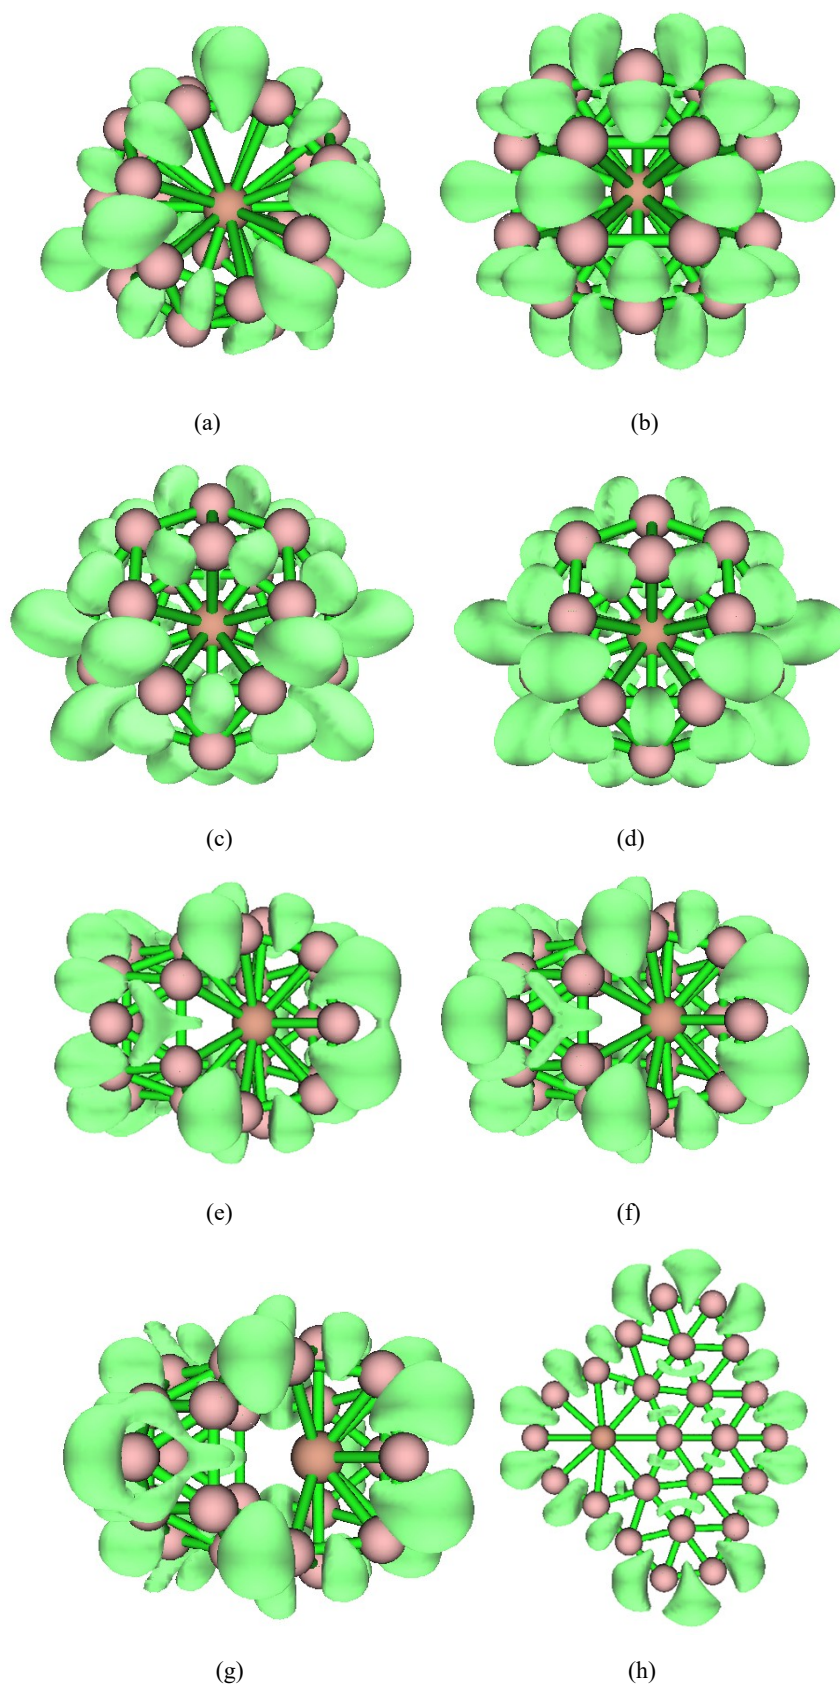

**Figure. S12** Electron localization function (ELF) with the isovalue set to 0.80. (a)  $\text{ScB}_{24}^-$ ; (b)  $\text{TiB}_{24}^-$ ; (c)  $\text{VB}_{24}^-$ ; (d)  $\text{CrB}_{24}^-$ ; (e)  $\text{MnB}_{24}^-$ ; (f)  $\text{FeB}_{24}^-$ ; (g)  $\text{CoB}_{24}^-$ ; (h)  $\text{NiB}_{24}^-$ .

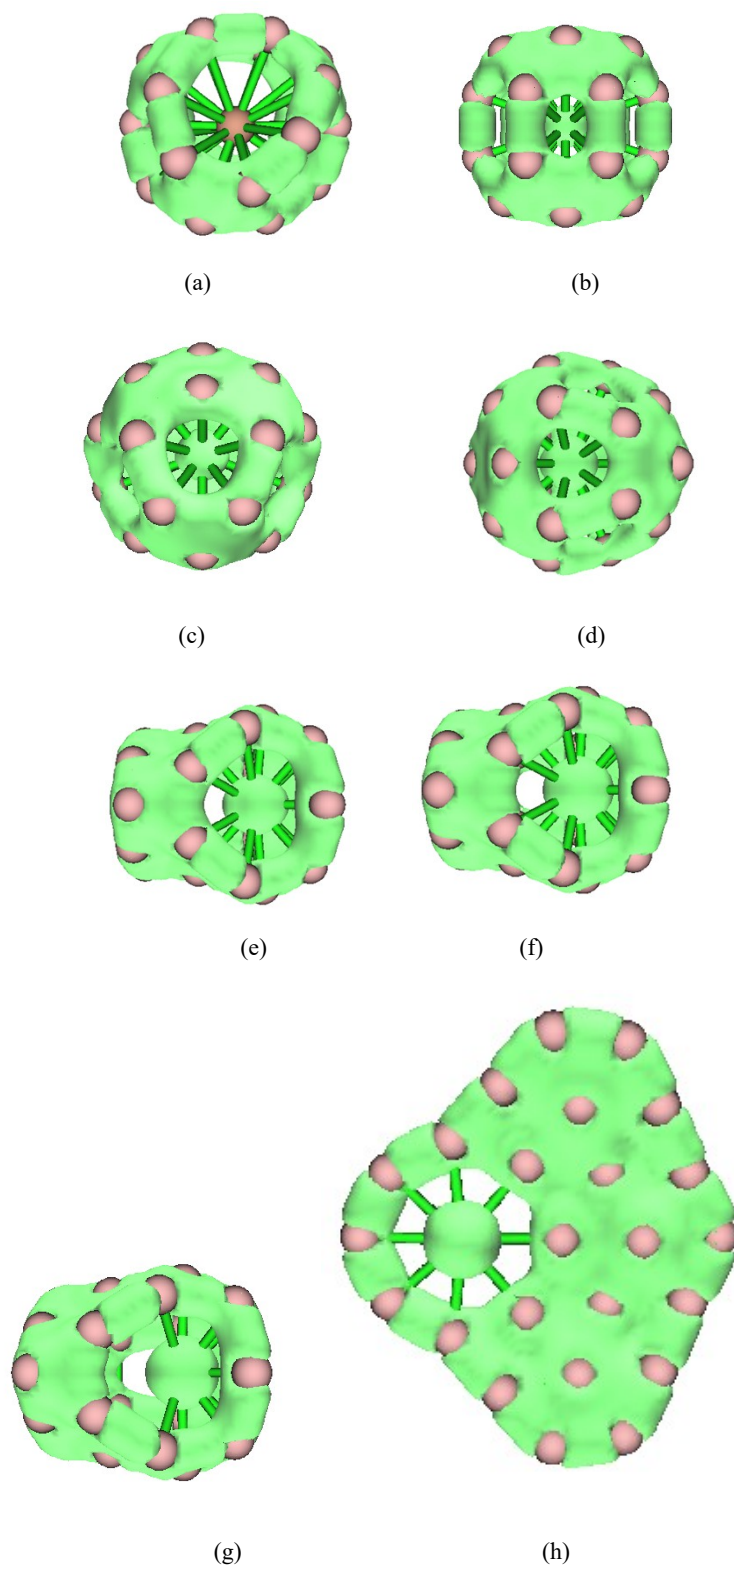

**Figure. S13** Valence electron density with the isovalue set to 0.1. (a)  $\text{ScB}_{24}^-$ ; (b)  $\text{TiB}_{24}^-$ ; (c)  $\text{VB}_{24}^-$ ; (d)  $\text{CrB}_{24}^-$ ; (e)  $\text{MnB}_{24}^-$ ; (f)  $\text{FeB}_{24}^-$ ; (g)  $\text{CoB}_{24}^-$ ; (h)  $\text{NiB}_{24}^-$ .

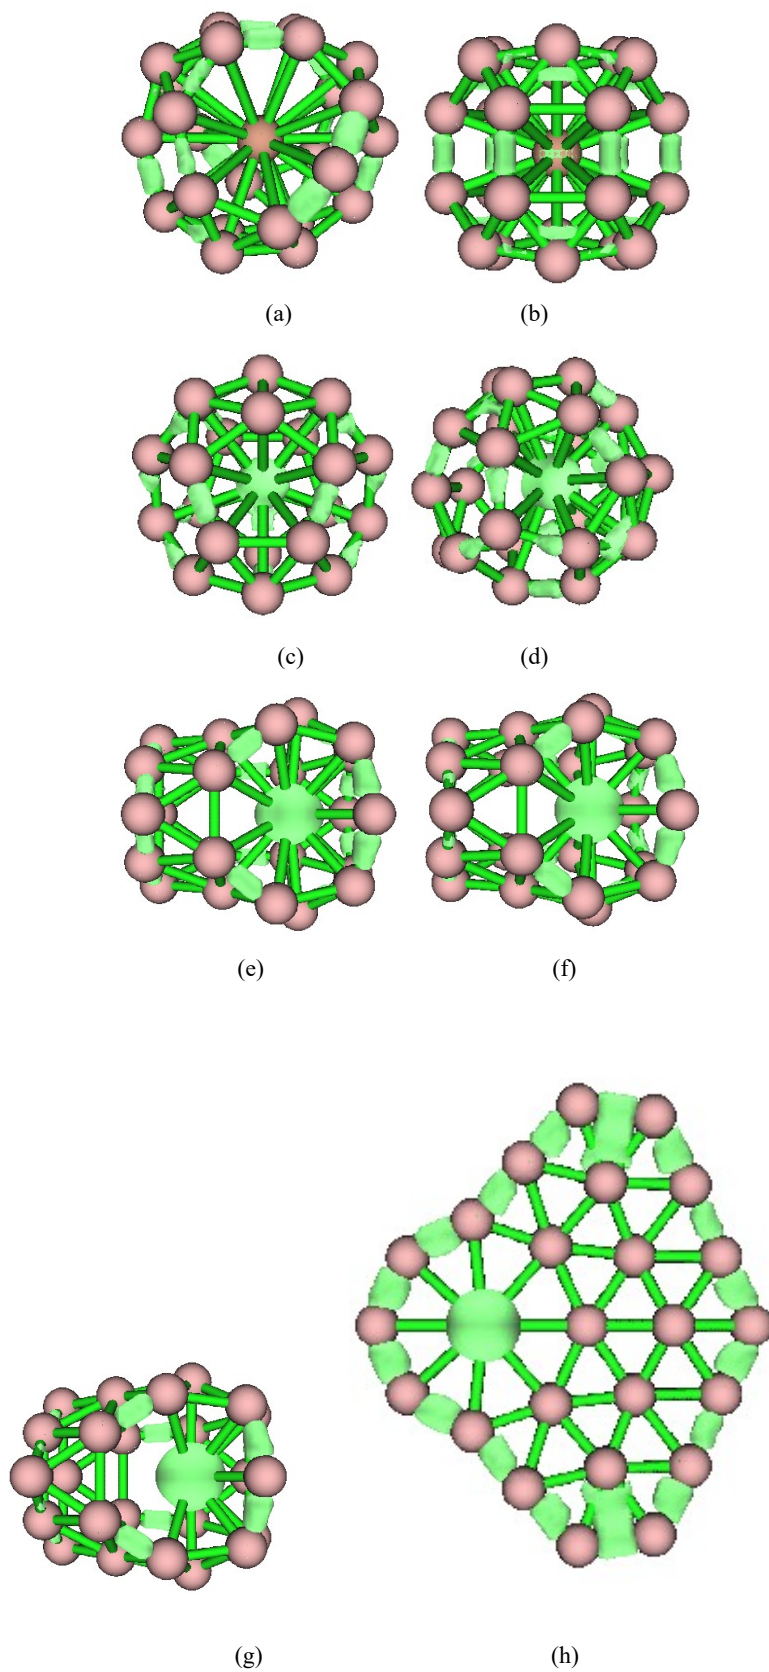

**Figure. S14** Valence electron density with the isovalue set to 0.14. (a)  $\text{ScB}_{24}^-$ ; (b)  $\text{TiB}_{24}^-$ ; (c)  $\text{VB}_{24}^-$ ; (d)  $\text{CrB}_{24}^-$ ; (e)  $\text{MnB}_{24}^-$ ; (f)  $\text{FeB}_{24}^-$ ; (g)  $\text{CoB}_{24}^-$ ; (h)  $\text{NiB}_{24}^-$ .

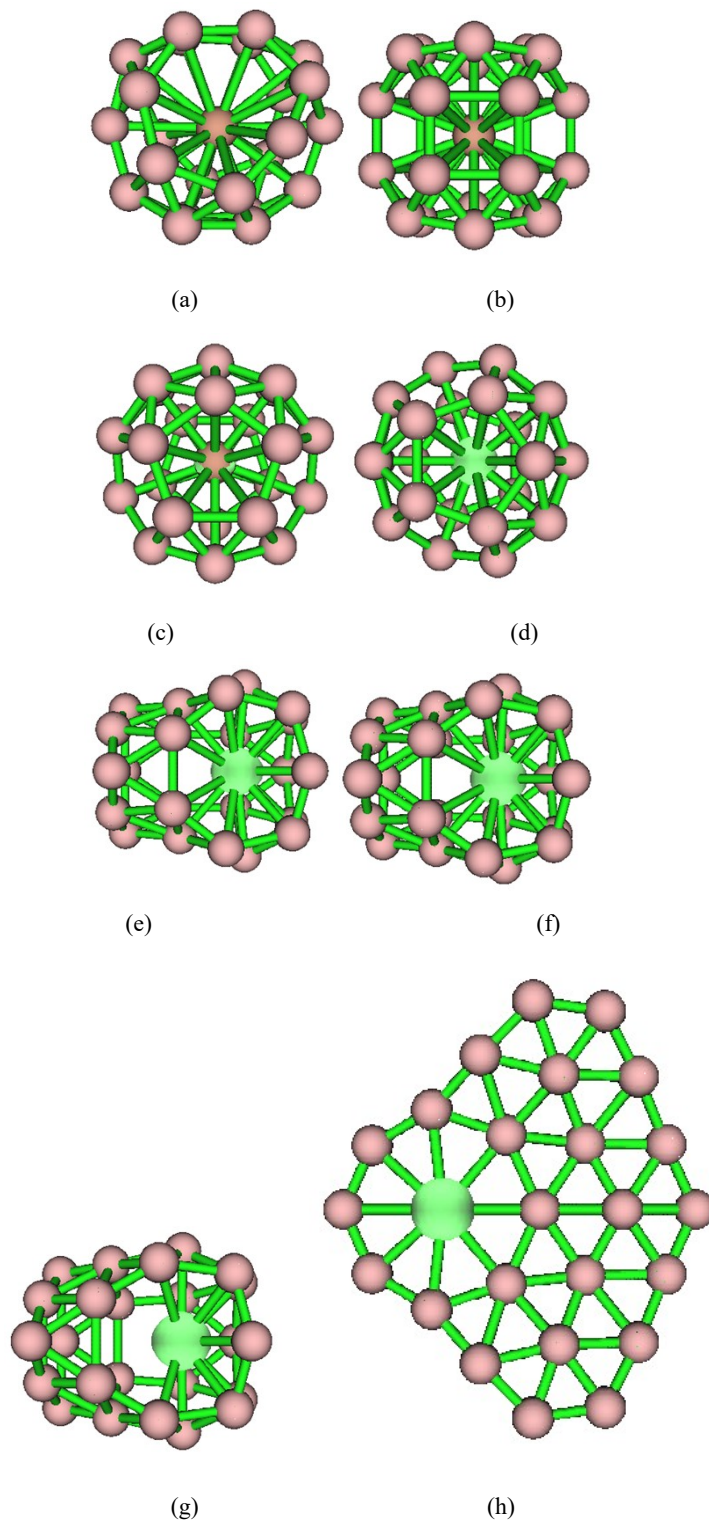

**Figure. S15** Valence electron density with the isovalue set to 0.20. (a)  $\text{ScB}_{24}^-$ ; (b)  $\text{TiB}_{24}^-$ ; (c)  $\text{VB}_{24}^-$ ; (d)  $\text{CrB}_{24}^-$ ; (e)  $\text{MnB}_{24}^-$ ; (f)  $\text{FeB}_{24}^-$ ; (g)  $\text{CoB}_{24}^-$ ; (h)  $\text{NiB}_{24}^-$ .

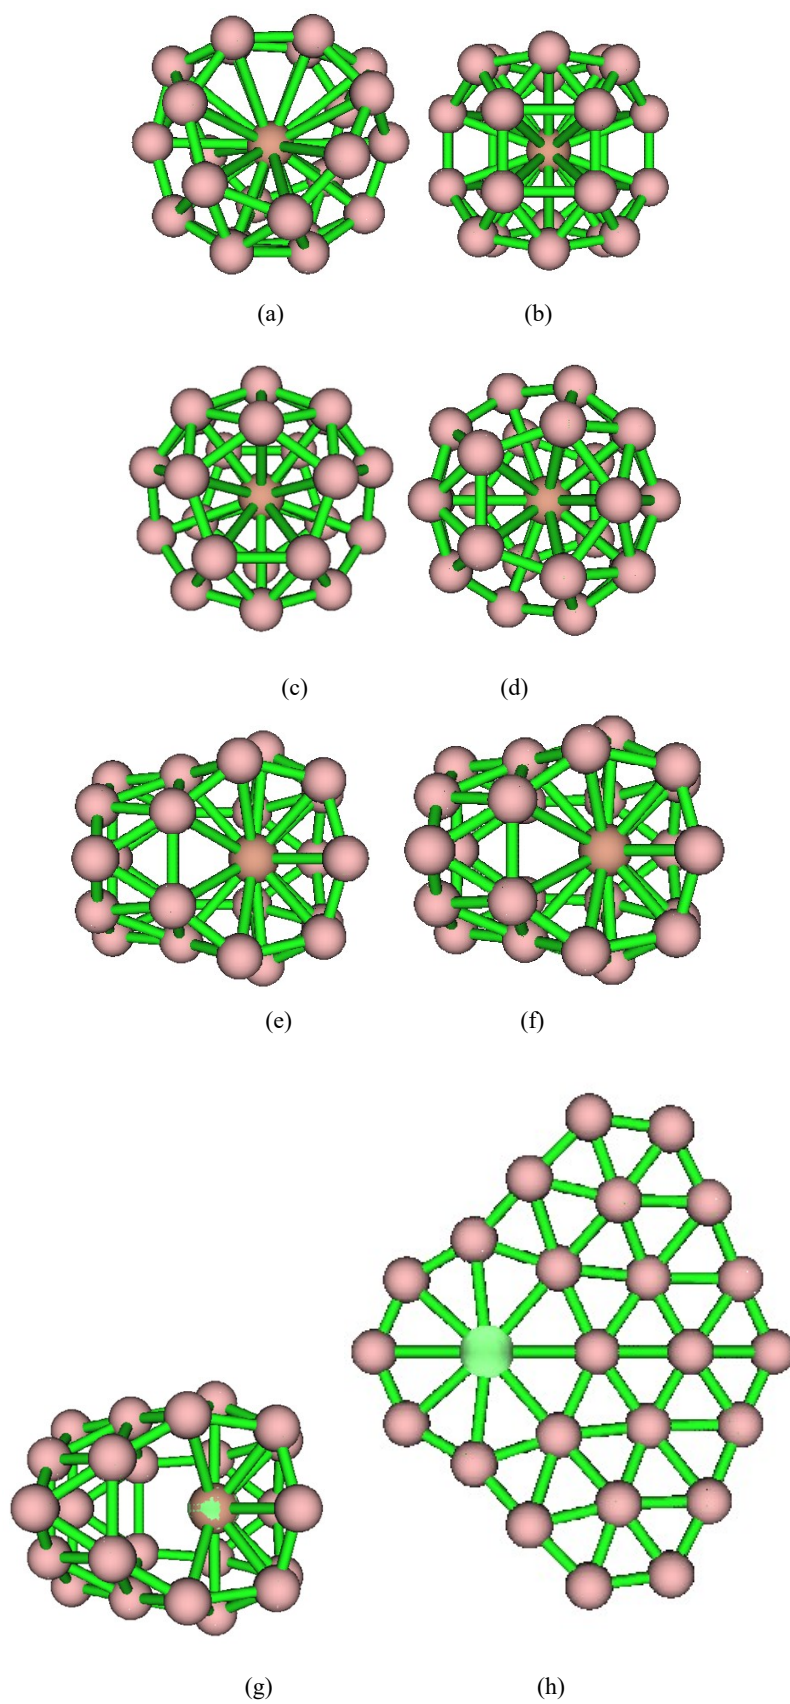

**Figure. S16** Valence electron density with the isovalue set to 0.52. (a)  $\text{ScB}_{24}^-$ ; (b)  $\text{TiB}_{24}^-$ ; (c)  $\text{VB}_{24}^-$ ; (d)  $\text{CrB}_{24}^-$ ; (e)  $\text{MnB}_{24}^-$ ; (f)  $\text{FeB}_{24}^-$ ; (g)  $\text{CoB}_{24}^-$ ; (h)  $\text{NiB}_{24}^-$ .
